# Supplementary material for: Cannabidiol as a Promising Therapeutic Option in IC/BPS: In Vitro Evaluation of Its Protective Effects against Inflammation and Oxidative Stress
Source: MDPI journal article supplement (doi:10.3390/ijms24055055), 2023-03-06
Supplement: s1 [file s1]

**Supplementary Table S1.** List of mRNA primers used for qPCR.

| mRNA          | Forward sequence (5'-3') | Reverse sequence (5'-3') |
|---------------|--------------------------|--------------------------|
| GAPDH         | CGGATTTGGTCGTATTGG       | TCCTGGAAGATGGTGATG       |
| IL1 $\alpha$  | AGATGCCTGAGATACCCAAAACC  | CCAAGCACACCCAGTAGTCT     |
| IL6           | CCCTGAGAAAGGAGACATGTA    | CCTCTTTGCTGCTTTCACACA    |
| IL8           | TTTTGCCAAGGAGTGCTAAAGA   | AACCTCTGCACCCAGTTTTTC    |
| CXCL1         | AACCGAAGTCATAGCCACACT    | TCTGGTCAGTTGGATTTGTCACT  |
| CXCL10        | AGTGGCATTCAAGGAGTACCT    | GATCTCAACACGTGGACAAAATTG |
| SAA1          | AGAGATTCTTTGGCCATGGTG    | TCGGAAGTGATTGGGGTCTT     |
| NRF2          | CATTCTGCTGAGTTTGATTGGGG  | TTGTGGAAGTGGGTCTGAGTAT   |
| SOD1          | ACAAACATCCTCTGCCCGAT     | AACGACTTCCACCGTTTCCT     |
| SOD2          | TGCTCCACACATCAATCC       | GGTTGGCTTGGTTTCAATAAGG   |
| HO1           | AAGACTGCGTTCCTGCTCAAC    | AAAGCCCTACAGCAACTGTCG    |
| COX2          | AAGCGAGGGCCAGCTTTCACCA   | CCAAAGACCTCCTGCCCCACAGC  |
| KEAP1         | GTGTCCATTGAGGGTATCCACC   | GCTCAGCGAAGTTGGCGAT      |
| NQO1          | GAAGAGCACTGATCGTACTGGC   | GGATACTGAAAGTTCGCAGGG    |
| CB1           | GATACCACCTTCCGCACCAT     | TACCCTAATTTGGATGCCATGTC  |
| CB2           | ATCATGTGGGTCCTCTCAG      | GATTCCGGAAAAGAGGAAGG     |
| TRPV1         | GCCTGAAGGAGCTTGTC AAC    | CGCCCTTTGGTTTTCTTAAA     |
| PPAR $\gamma$ | TACTGTCGGTTTCAGAAATGCC   | GTCAGCGGACTCTGGATTGAG    |
