# Supplementary figures and images for: Cannabidiol as a Promising Therapeutic Option in IC/BPS: In Vitro Evaluation of Its Protective Effects against Inflammation and Oxidative Stress
Source: MDPI journal article supplement (doi:10.3390/ijms24055055), 2023-03-06

## KEAP1

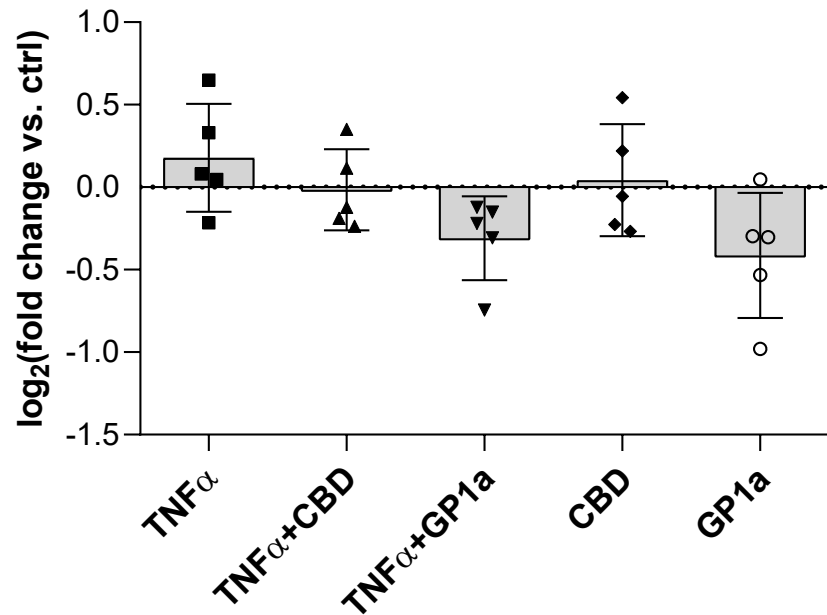

## NQO1

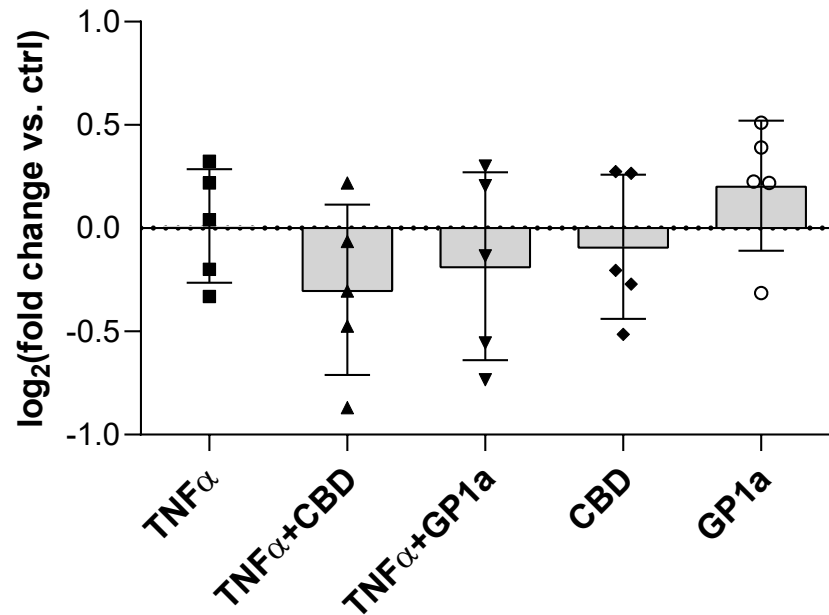

Supplement: s1 [file s1]

# DMSO

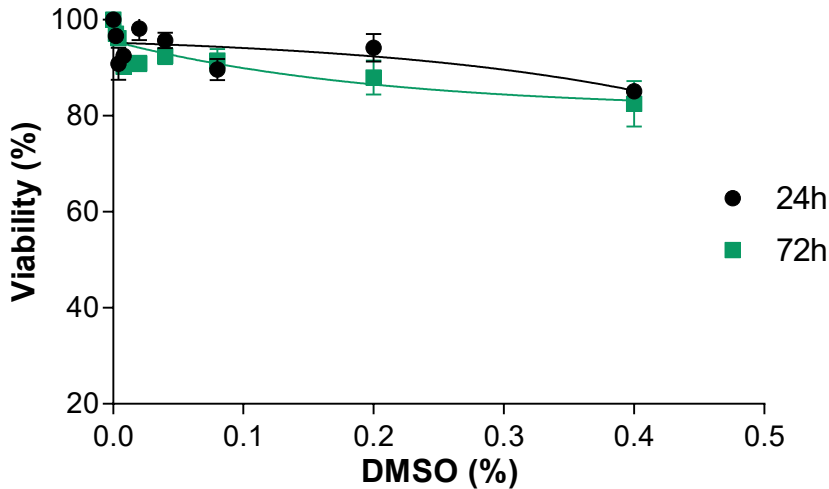

Supplement: s1 [file s1]

# IL8

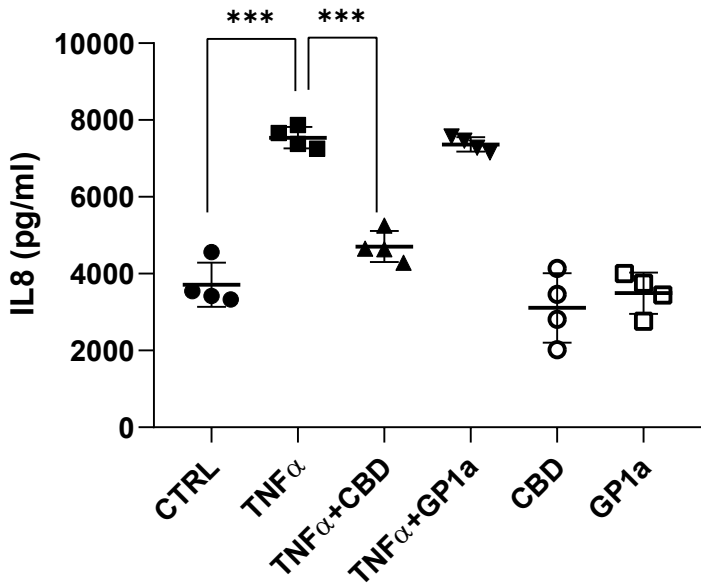

Supplement: s1 [file s1]

# IL8

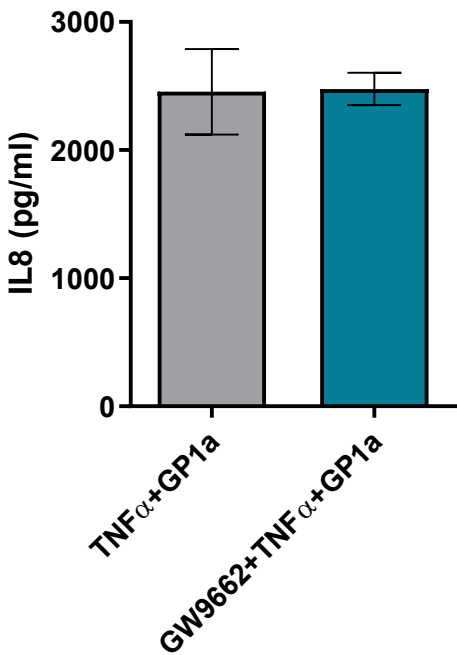

Supplement: s1 [file s1]

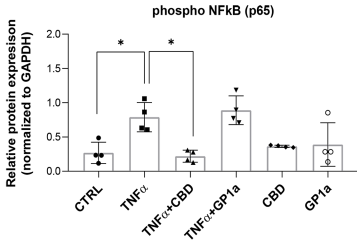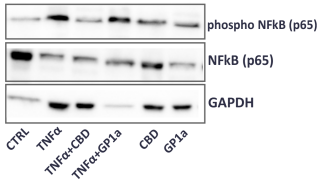

Supplement: s1 [file s1]
